# Supplementary material for: Rapid characterization and determination of isoflavones and triterpenoid saponins in Fu-Zhu-Jiang-Tang tablets using UHPLC-Q-TOF/MS and HPLC-UV
Source: Royal Society of Chemistry journal article supplement (doi:10.1039/c6ay00732e), 2016-01-01
Supplement: c6ay00732e5.pdf [file c6ay00732e5.pdf]

**1 Supporting Information**

**2 Figure S1.** HPLC chromatograms of FZJT tablets at different extraction conditions.

**3 (A)** Solvent volume, **(B)** extraction time, **(C)** solvent ratio

**4 Figure S2.** Extractions rates of the ten major compounds at different extraction

**5 conditions.** **(A)** Solvent ratio, **(B)** extraction time, **(C)** solvent volume

**6 Figure S3.** Typical HPLC-UV chromatograms (254nm) of FZJT tablet **(A)**, FZJT

**7 total fraction (B)** and mixture standards **(C)**, 1. 3'-Hydroxypuerarin, 2. Puerarin, 3. 3'-

**8 Methoxypuerarin, 4. Daidzin, 5. Rutin, 6. Astragalin, 7. Daidzein**

**9 Figure S4.** Typical HPLC-UV chromatograms (210nm) of FZJT tablets **(A)**, FZJT

**10 total fraction (B)** and mixture standards **(C)**, 8. Ginsenoside Rg<sub>1</sub>, 9. Astragaloside IV,

**11 10. 20(S)-Ginsenoside Rg<sub>3</sub>**

**12 Table S1.** Regressive equations, linear ranges, LOD and LOQ of ten constituents

**13 Table S2.** Stability, intra-day and inter-day precision of the proposed method

**14 Table S3.** Recoveries of ten major constituents using the proposed method

**15 Table S4.** The concentrations of compounds **5**, **6** and **10** in the sample
