# Supplementary material for: Rapid characterization and determination of isoflavones and triterpenoid saponins in Fu-Zhu-Jiang-Tang tablets using UHPLC-Q-TOF/MS and HPLC-UV
Source: Royal Society of Chemistry journal article supplement (doi:10.1039/c6ay00732e), 2016-01-01
Supplement: c6ay00732e9.pdf [file c6ay00732e9.pdf]

**Table S4. The concentrations of compounds 5, 6 and 10 in the sample**

|             | Concentration (µg/mL) |            |                                            |
|-------------|-----------------------|------------|--------------------------------------------|
|             | Rutin                 | Astragalin | 20( <i>S</i> )-Ginsenoside Rg <sub>3</sub> |
| Batch No.1  | 36.67                 | 7.73       | 30.91                                      |
| Batch No.2  | 37.85                 | 9.20       | 32.39                                      |
| Batch No.3  | 45.29                 | 11.89      | 45.05                                      |
| Batch No.4  | 44.28                 | 13.75      | 51.54                                      |
| Batch No.5  | 26.94                 | 9.47       | 34.41                                      |
| Batch No.6  | 44.58                 | 12.37      | 41.39                                      |
| Batch No.7  | 44.22                 | 10.20      | 42.38                                      |
| Batch No.8  | 56.13                 | 5.24       | 36.60                                      |
| Batch No.9  | 36.27                 | 9.20       | 32.12                                      |
| Batch No.10 | 25.20                 | 6.83       | 27.89                                      |
